# Supplementary material
Source: PubMed Central journal article supplement (PMC5481563)

# Thrombin Activation of Protein C Requires Prior Processing by a Liver Proprotein Convertase

**Rachid Essalmani\***, **Delia Susan-Resiga\***, **Johann Guillemot\***, **Kim WooJin\***, **Vatsal Sachan\***,  
**Zuhier Awan\***, **Ann Chamberland\***, **Marie-Claude Asselin\***, **Kévin Ly\*\***, **Roxane Desjardins\*\***,  
**Robert Day\*\***, **Annik Prat\*** and **Nabil G. Seidah\*<sup>¶</sup>**

## **SUPPLEMENTAL FIGURE LEGENDS**

**FIGURE S2.** QPCR analysis of liver mRNA transcripts of furin, PACE4, PC5/6 and PC7 in WT and PACE4-KO mice. No significant differences in the mRNA levels (normalized to  $\beta$ -actin) of furin, PC5/6 or PC7 are observed between WT and PACE-KO mice (n=4 mice in each genotype).

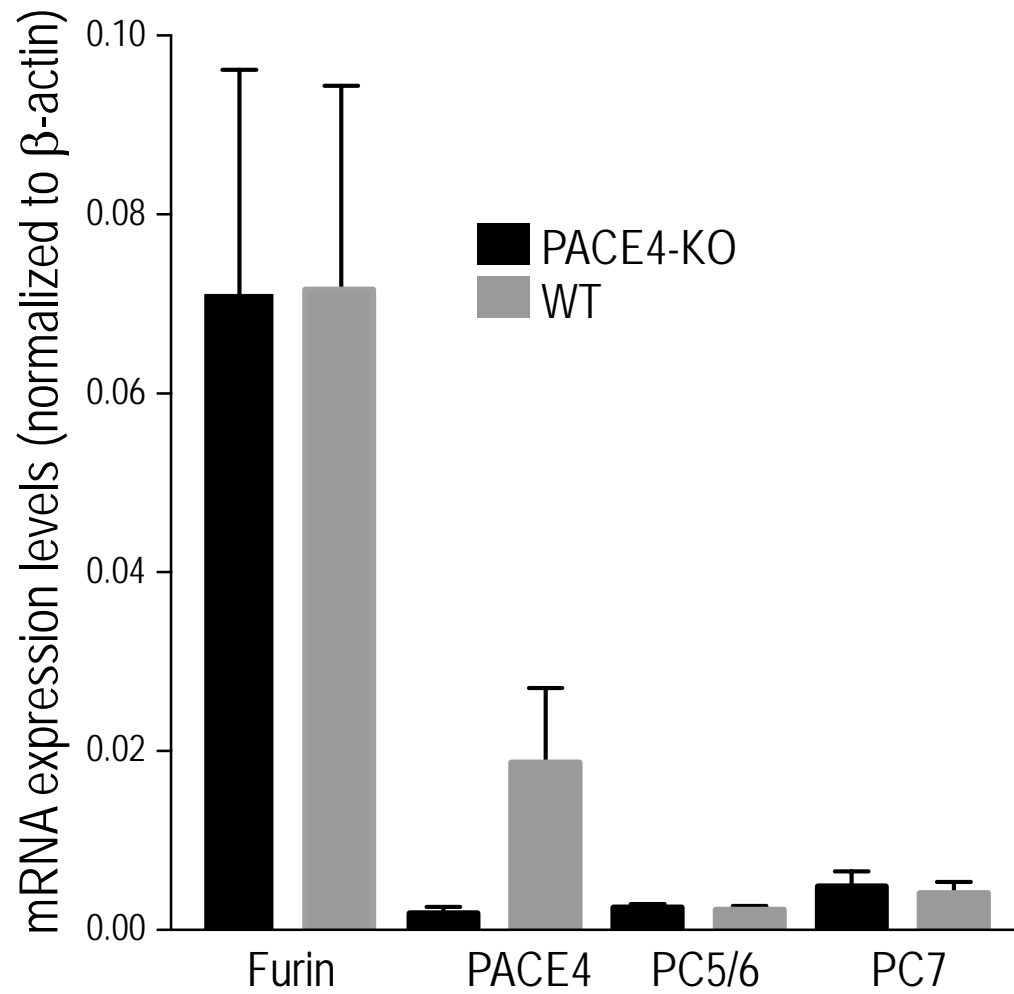

Supplement: 10.1074_M116.770040_jbc.M116.770040-2.pdf [file 10.1074_M116.770040_jbc.M116.770040-2.pdf]
