# Supplementary material
Source: PubMed Central journal article supplement (PMC5481563)

# Thrombin Activation of Protein C Requires Prior Processing by a Liver Proprotein Convertase

Rachid Essalmani\*, Delia Susan-Resiga\*, Johann Guillemot\*, Kim WooJin\*, Vatsal Sachan\*, Zuhier Awan\*, Ann Chamberland\*, Marie-Claude Asselin\*, Kévin Ly\*\*, Roxane Desjardins\*\*, Robert Day\*\*, Annik Prat\* and Nabil G. Seidah\*<sup>¶</sup>

## SUPPLEMENTAL FIGURE LEGENDS

**FIGURE S3.** Activated Partial proThromboplastin Time (aPTT) and Prothrombin Time (PT) in KO mice lacking PC5/6 (PC5/6-hKO) or furin (Fur-hKO) in hepatocytes. The blood samples were collected in sodium citrate and then analyzed at 37°C. The time required for clot formation is measured photo-optically. The PT and PTT results are reported as the time required for clot formation after the addition of calcium. Measurements were carried out in independent 2 pools of 3 mice for each genotype and are expressed as percent of WT.

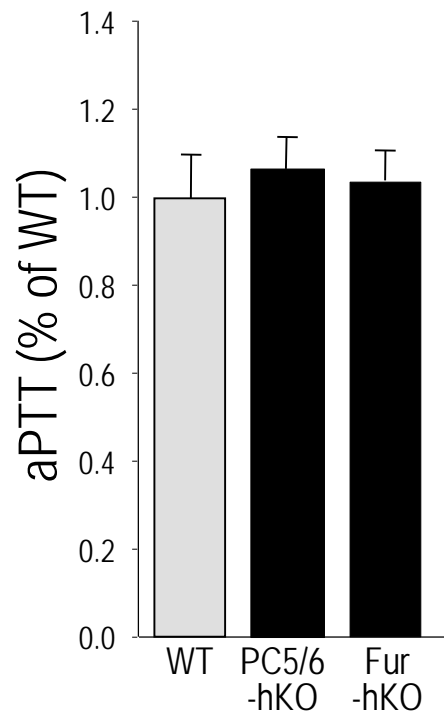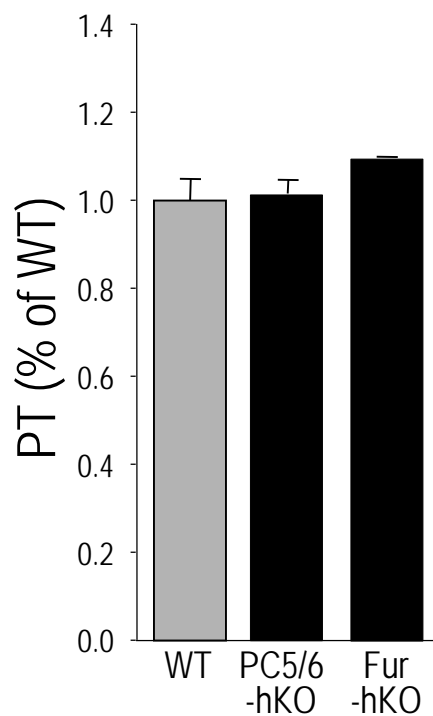

Supplement: 10.1074_M116.770040_jbc.M116.770040-3.pdf [file 10.1074_M116.770040_jbc.M116.770040-3.pdf]
